# Supplementary material
Source: publisher figshare collection journal article supplement (https://sage.figshare.com/ndownloader/files/22090083)
Supplement: Supplementary file 1 [file 22090083]

| **Table 2. *In situ* Hybridization Probes, Supplier and Technical Procedures for Visualization** | | |  |  |  |  |  |  |
| --- | --- | --- | --- | --- | --- | --- | --- | --- |
| **Probe** | **Type** | **Supplier, Catalog Number** |  |  |  |  |  |  |
| EBERa | Epstein-Barr Virus encoded RNA (EBER) | Leica Biosystems, PB0589 |  |  |  |  |  |  |
| Kappa light chaina | Kappa light chain mRNA, Human specific | Leica Biosystems, PB0645 |  |  |  |  |  |  |
| Lambda light chaina | Lambda light chain mRNA, Human specific | Leica Biosystems, PB0669 |  |  |  |  |  |  |
| a Leica BOND-MAX automated stainer (Leica Biosystems, Buffalo Grove, IL). ISH Protocol A. Bond Enzyme  Pretreatment Kit (AR9551), Enzyme 1, for 15 minutes. Bond Polymer Refine Red Detection Kit (DS9390). | | | | | | | | |
